# Supplementary material for: Preparation of π-extended fullerene derivatives through addition of phenylenediamine to open-cage fullerene derivatives
Source: Royal Society of Chemistry journal article supplement (doi:10.1039/d1qo01593a), 2021-11-18
Supplement: d1qo01593a1.pdf [file d1qo01593a1.pdf]

## Table of Contents

|                                                                                 |     |
|---------------------------------------------------------------------------------|-----|
| <sup>1</sup> H and <sup>13</sup> C NMR, HRMS, IR spectra for compound <b>2a</b> | S2  |
| <sup>1</sup> H and <sup>13</sup> C NMR, HRMS, IR spectra for compound <b>2b</b> | S4  |
| <sup>1</sup> H and <sup>13</sup> C NMR, HRMS, IR spectra for compound <b>3a</b> | S6  |
| <sup>1</sup> H and <sup>13</sup> C NMR, HRMS, IR spectra for compound <b>3b</b> | S8  |
| <sup>1</sup> H and <sup>13</sup> C NMR, HRMS, IR spectra for compound <b>4a</b> | S10 |
| <sup>1</sup> H and <sup>13</sup> C NMR, HRMS, IR spectra for compound <b>4b</b> | S12 |
| <sup>1</sup> H and <sup>13</sup> C NMR, HRMS, IR spectra for compound <b>5a</b> | S14 |
| <sup>1</sup> H and <sup>13</sup> C NMR, HRMS, IR spectra for compound <b>5b</b> | S16 |

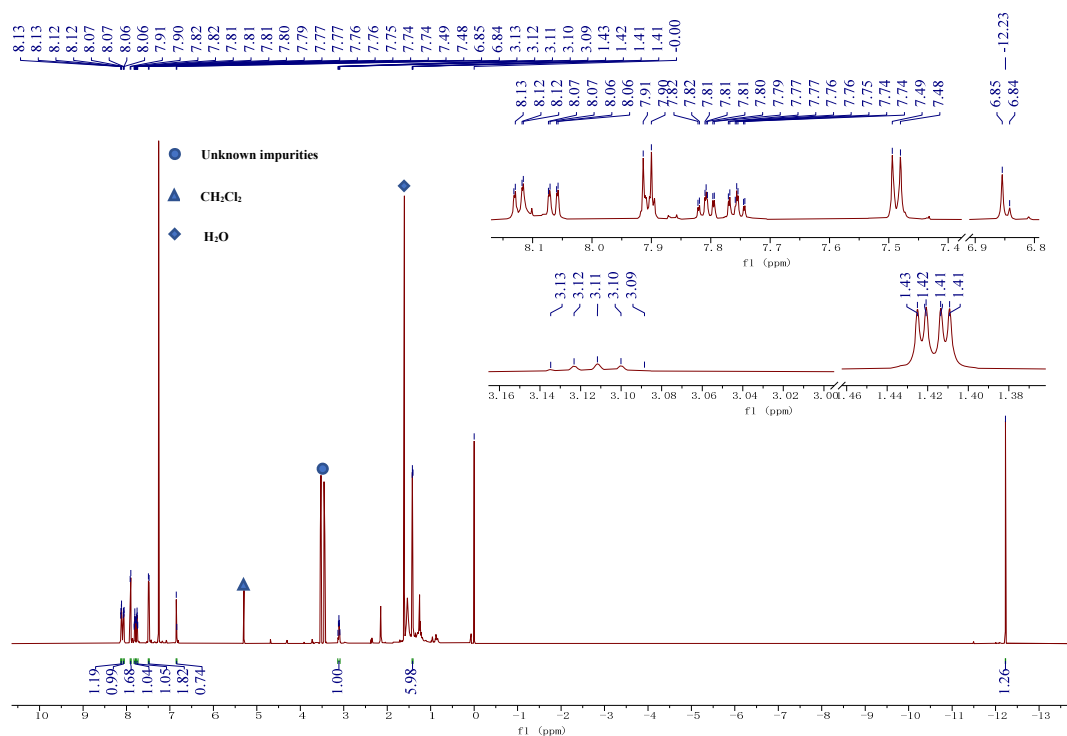

Figure S1  $^1\text{H}$  NMR spectrum of 2a (in  $\text{CDCl}_3$ )

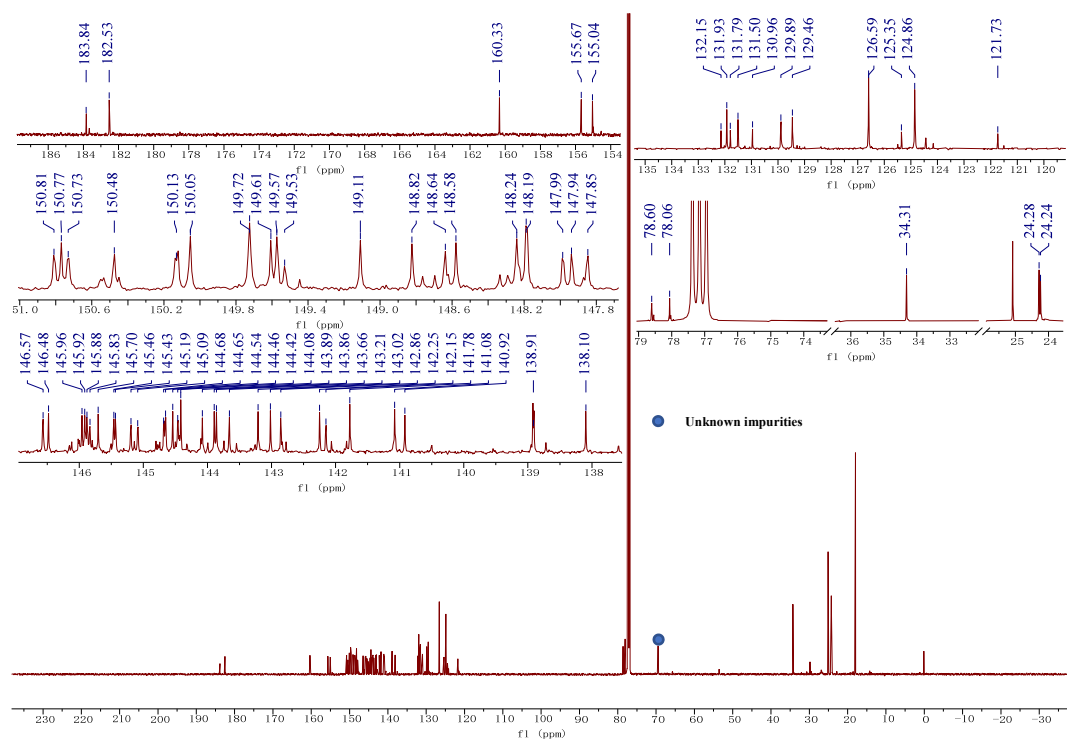

Figure S2  $^{13}\text{C}$  NMR spectrum of 2a (in  $\text{CDCl}_3$ )

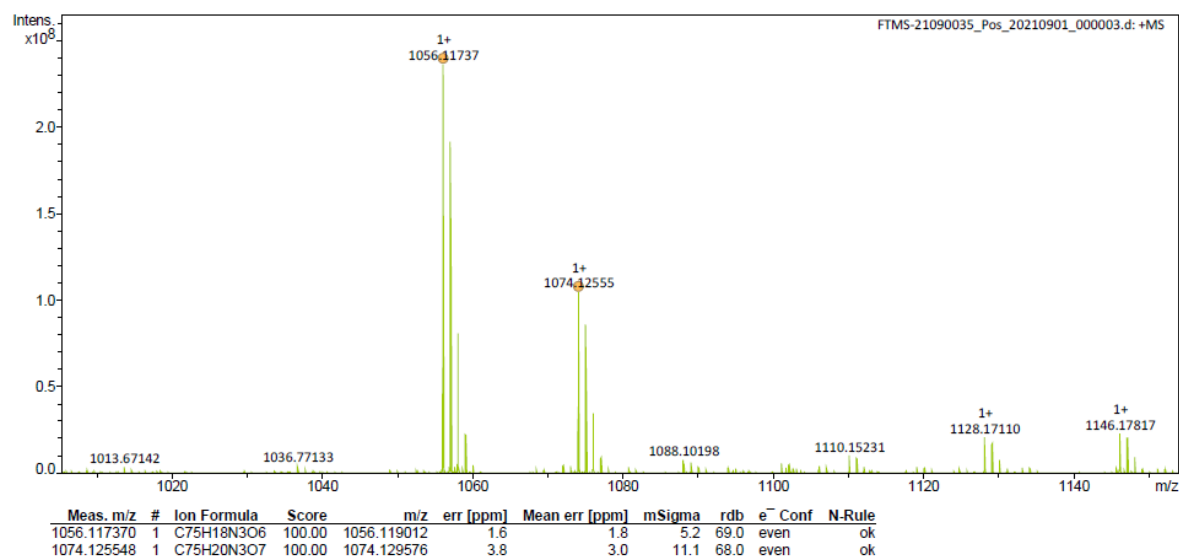

Figure S3 Mass spectrum of 2a

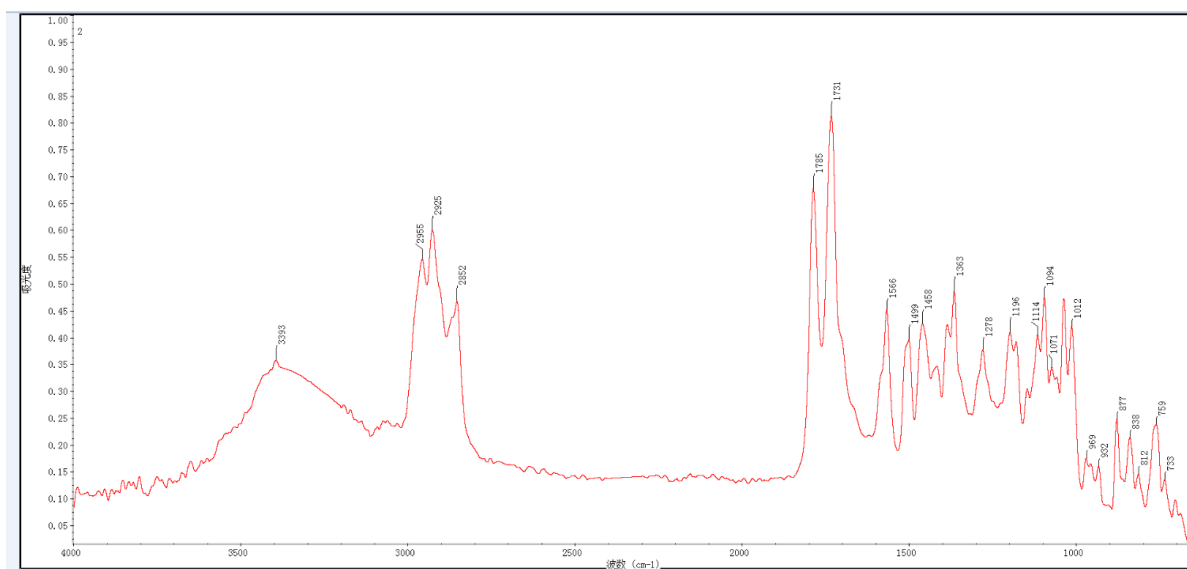

Figure S4 FTIR spectrum of 2a

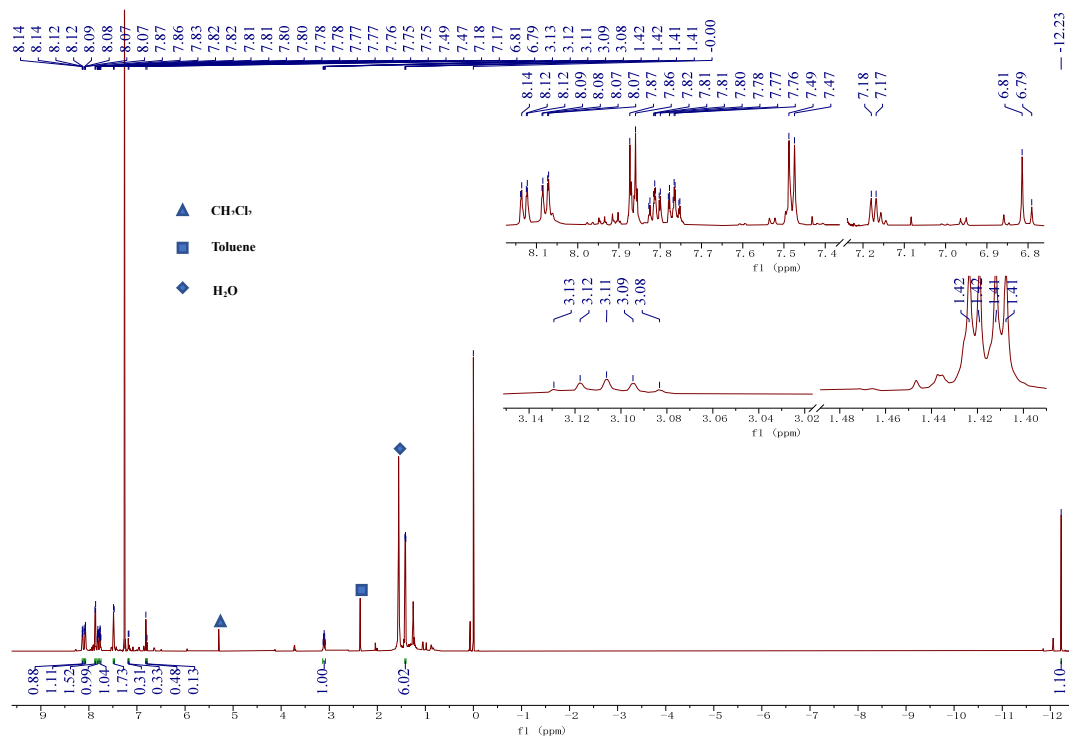

Figure S5  $^1\text{H}$  NMR spectrum of 2b (in  $\text{CDCl}_3$ )

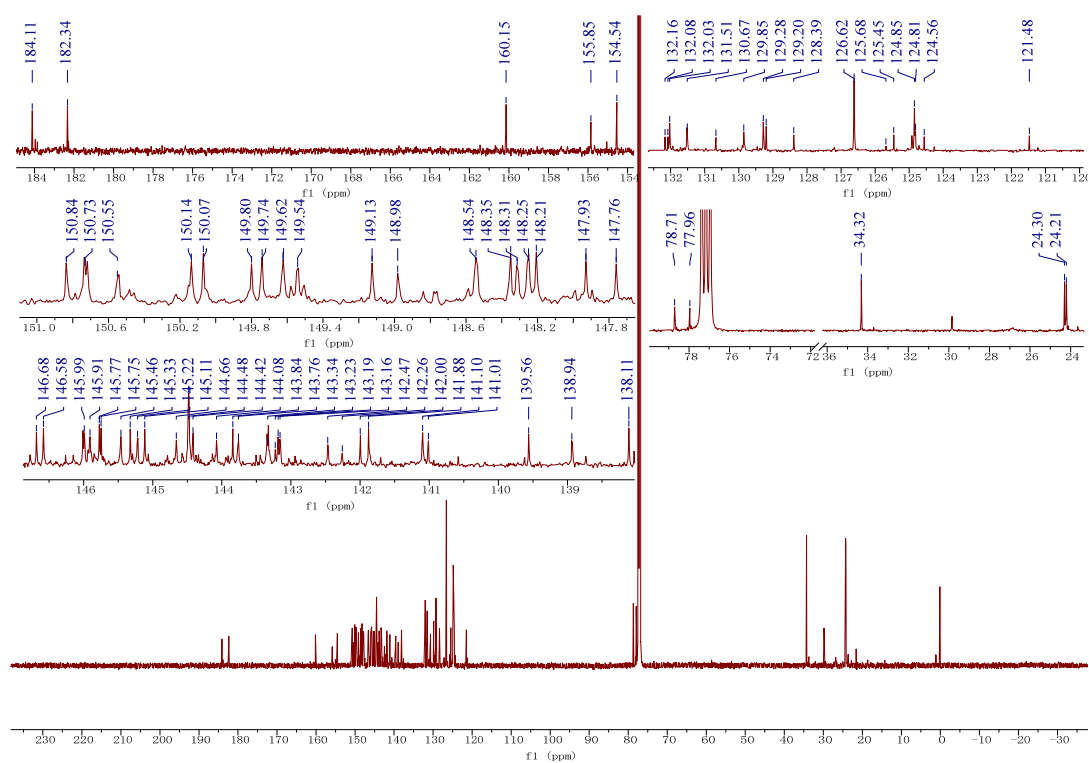

Figure S6  $^{13}\text{C}$  NMR spectrum of 2b (in  $\text{CDCl}_3$ )

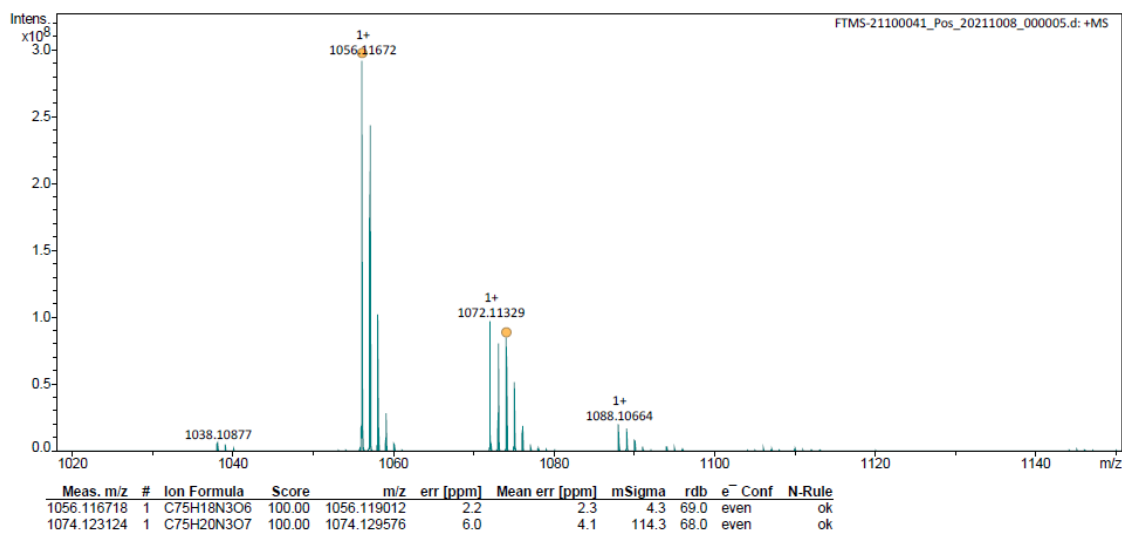

Figure S7 Mass spectrum of 2b

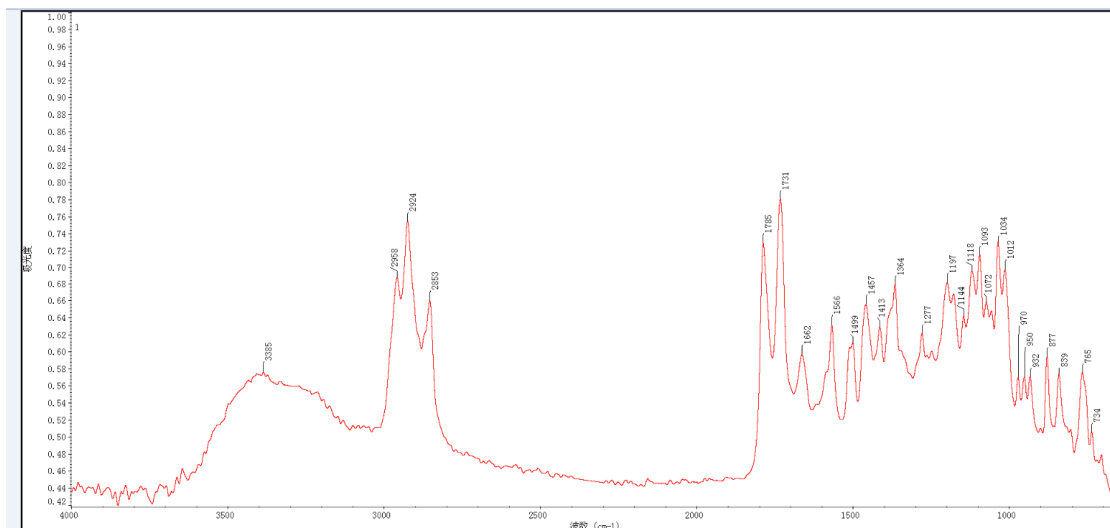

Figure S8 FTIR spectrum of 2b

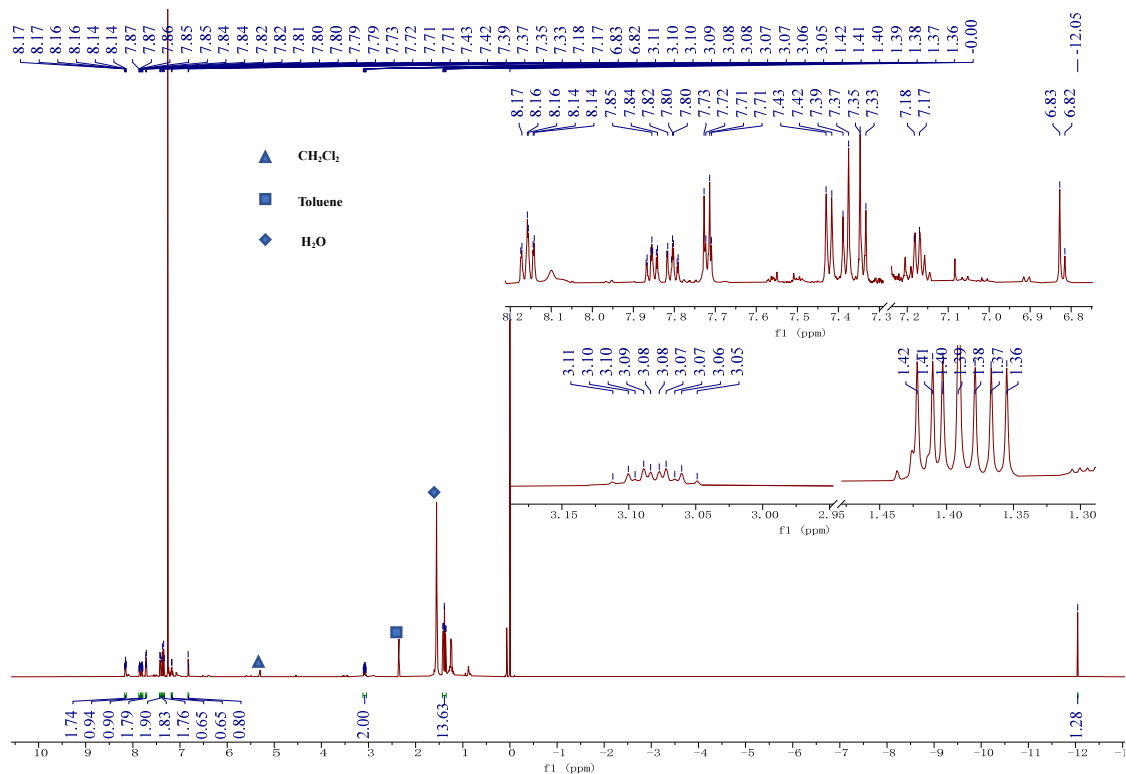

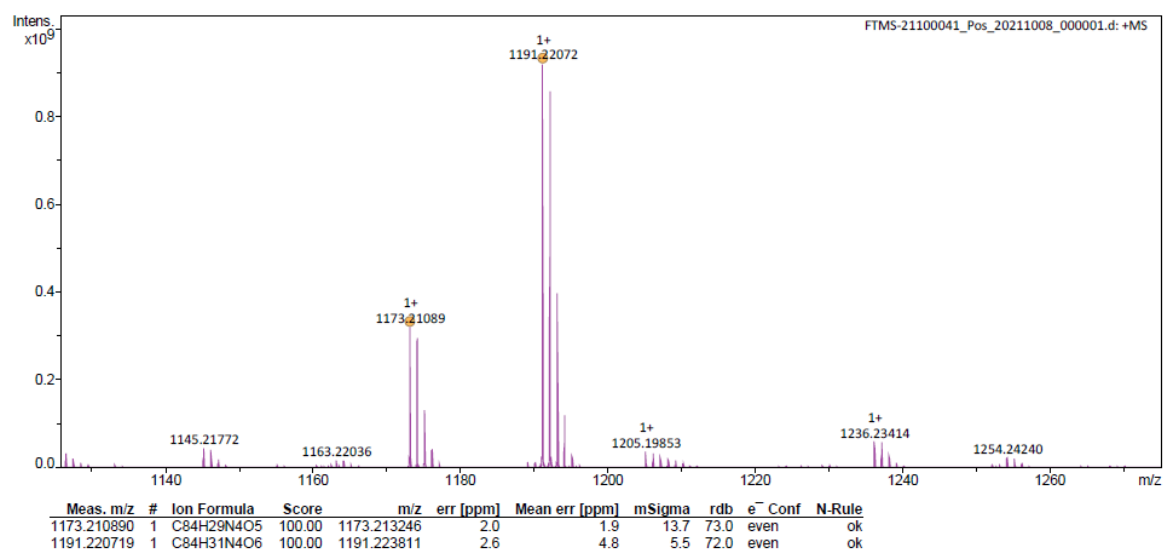

Figure S11 Mass spectrum of 3a

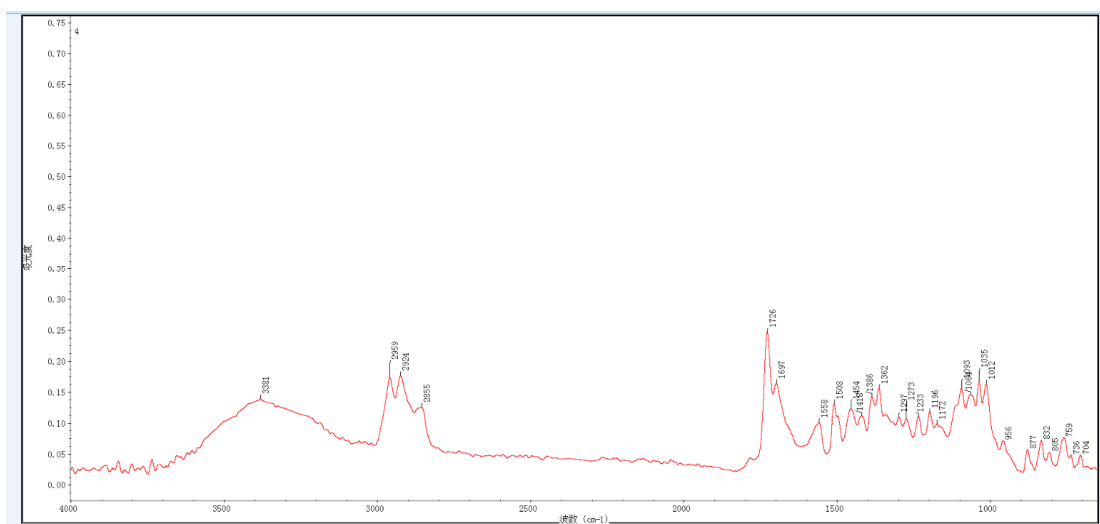

Figure S12 FTIR spectrum of 3a

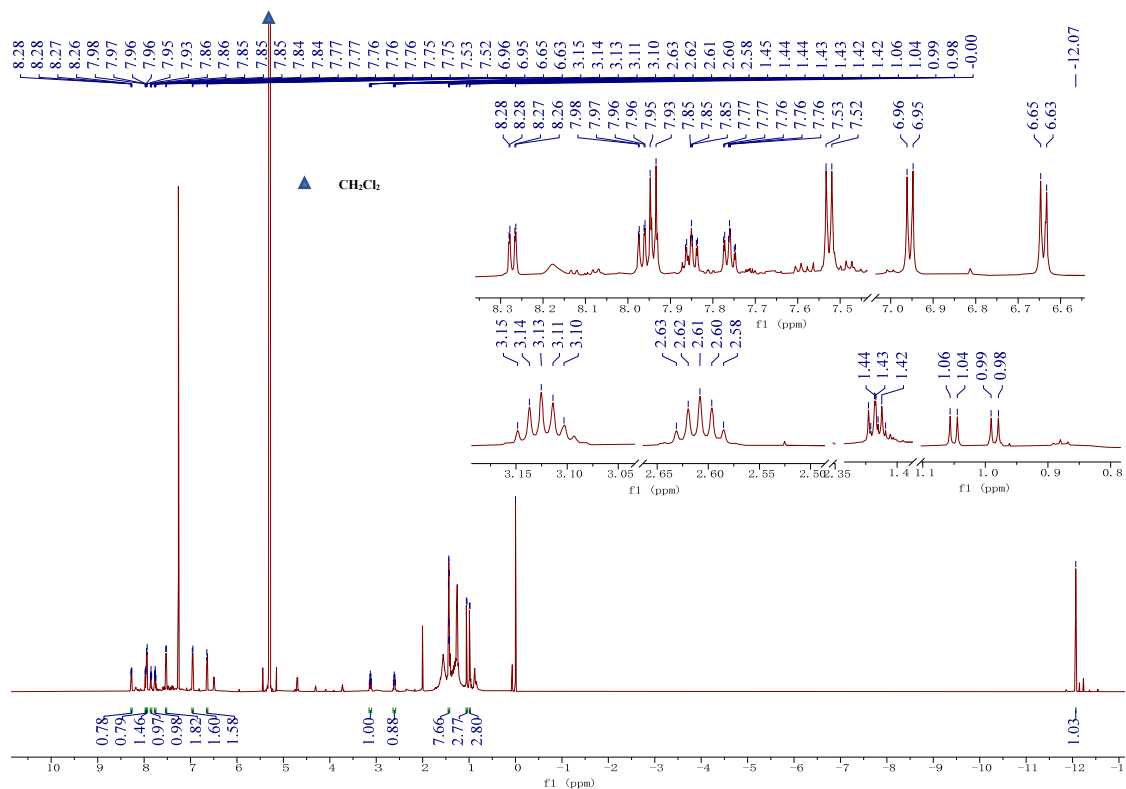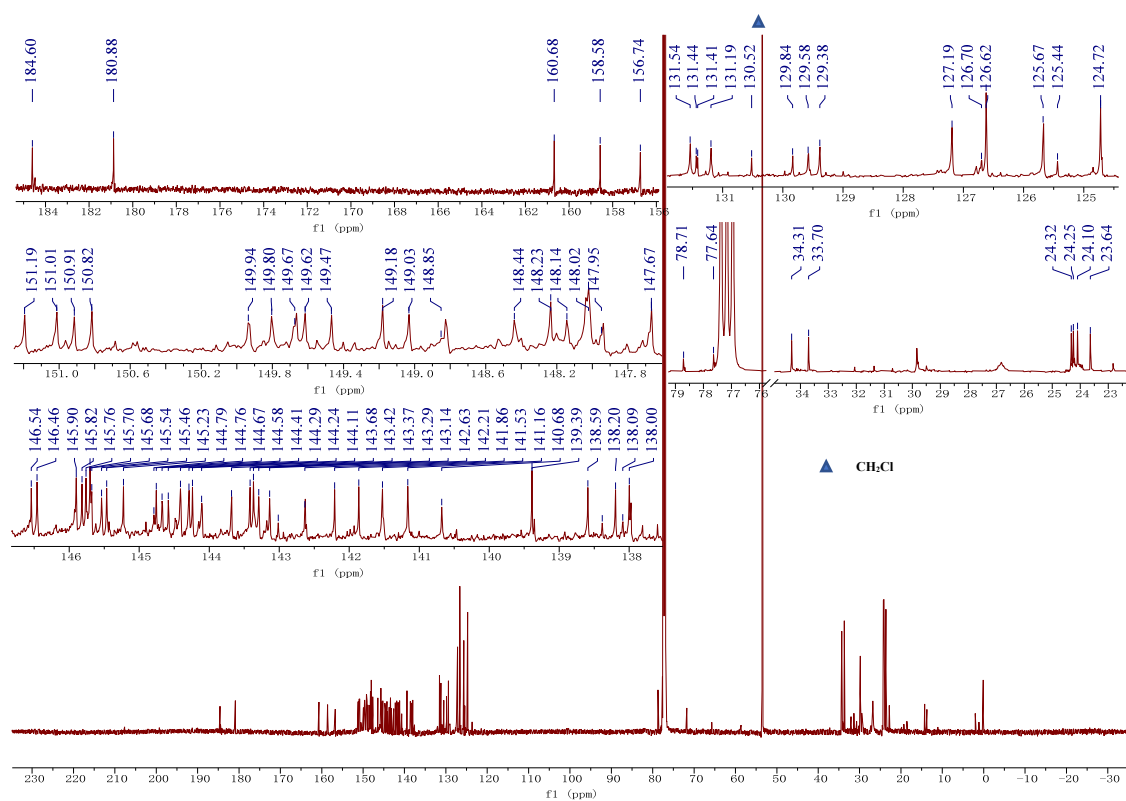



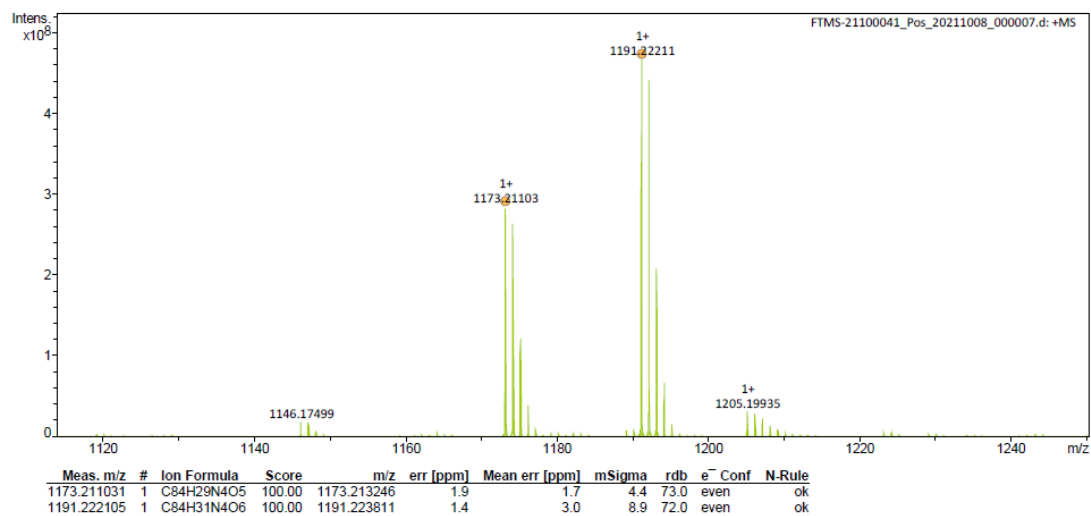

Figure S15 Mass spectrum of 3b

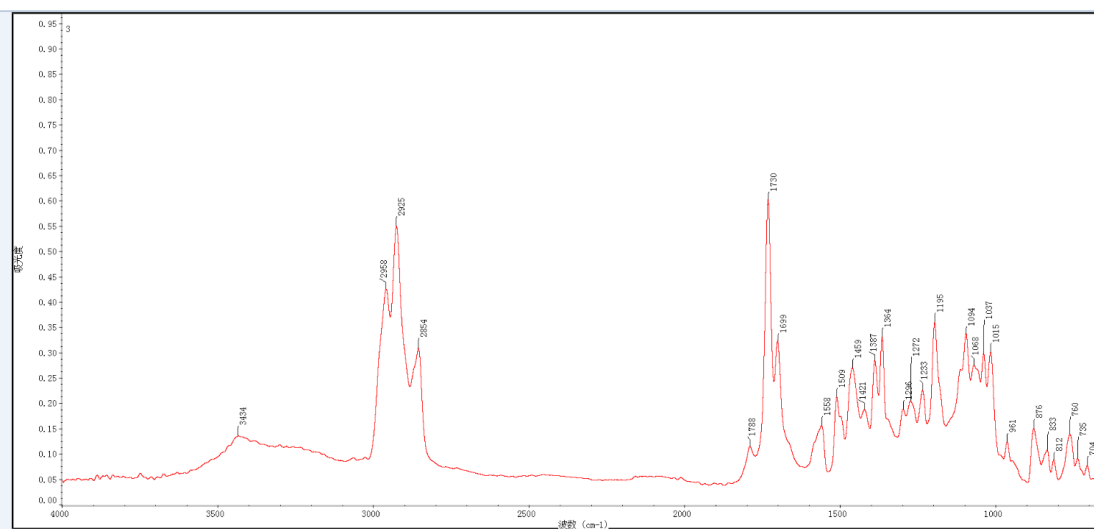

Figure S16 FTIR spectrum of 3b

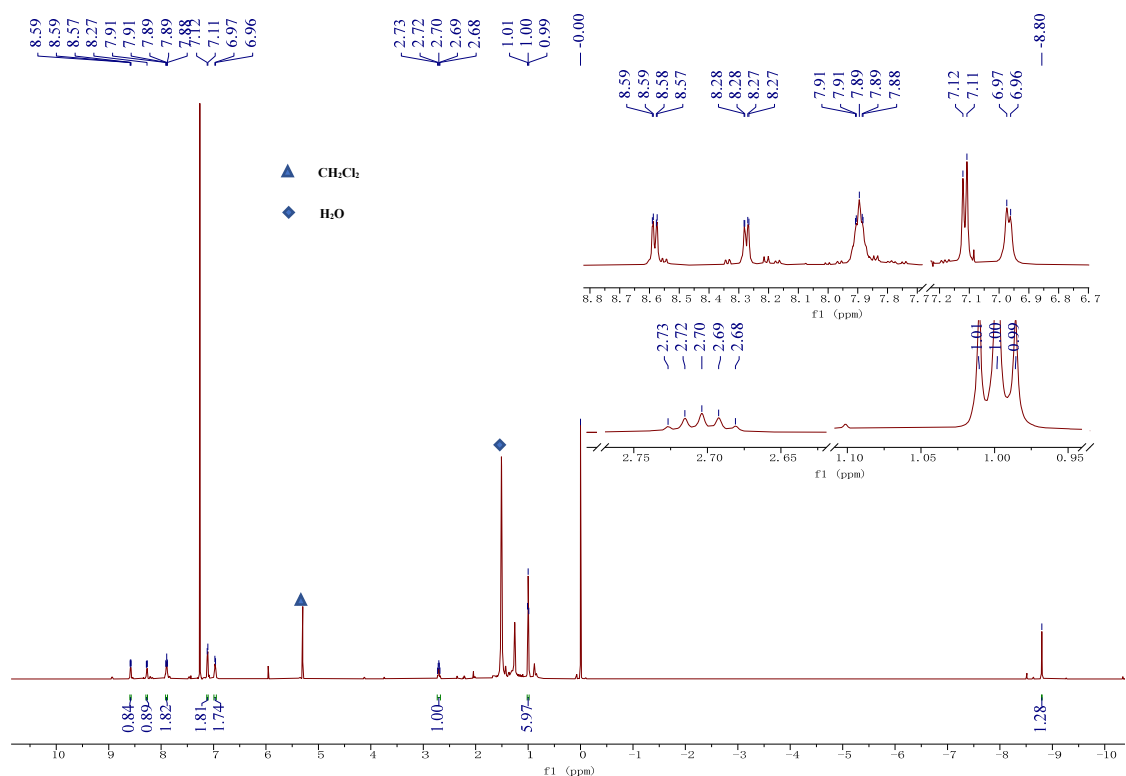

Figure S17 <sup>1</sup>H NMR spectrum of 4a (in CDCl<sub>3</sub>)

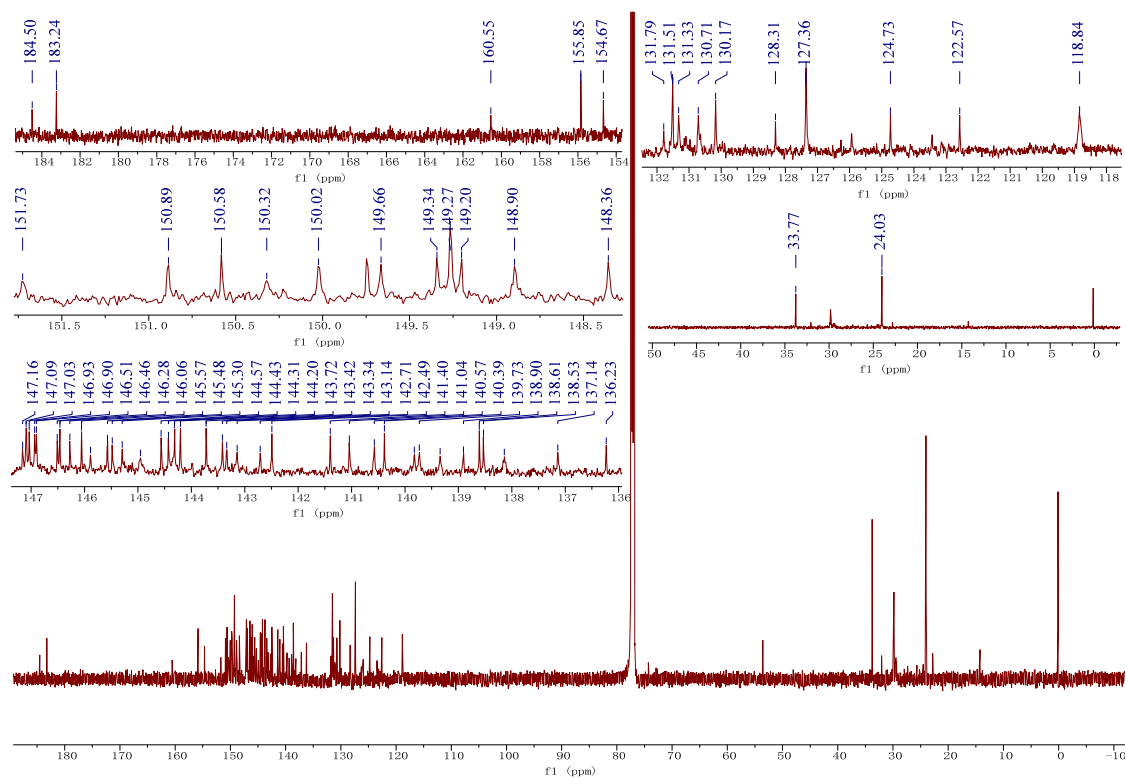

Figure S18 <sup>13</sup>C NMR spectrum of 4a (in CDCl<sub>3</sub>)

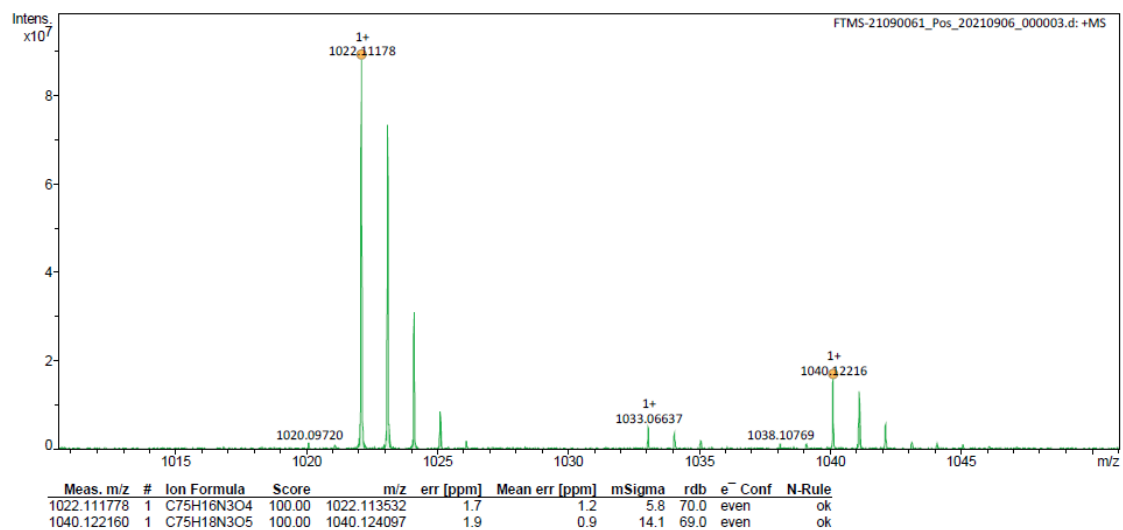

Figure S19 Mass spectrum of 4a

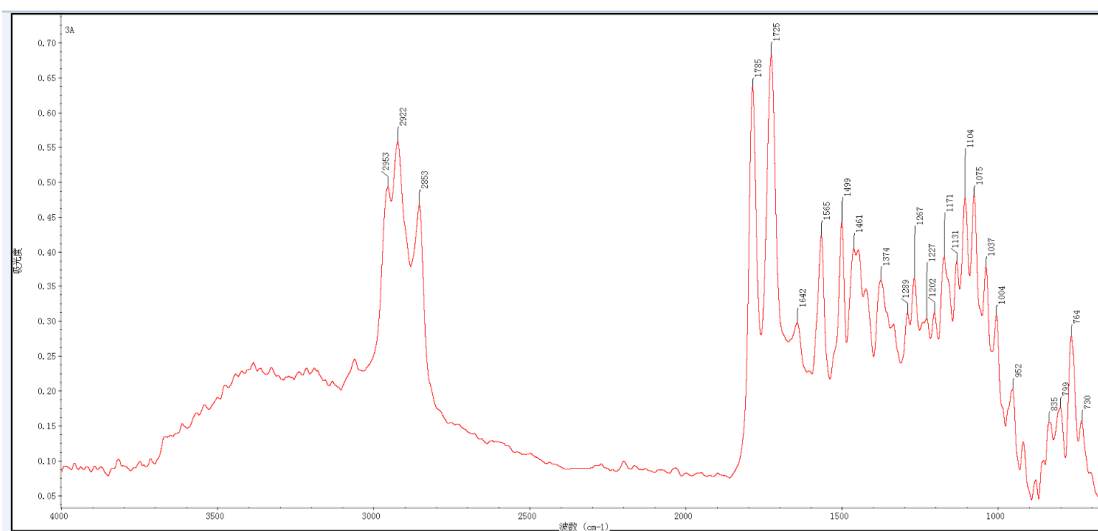

Figure S20 FTIR spectrum of 4a

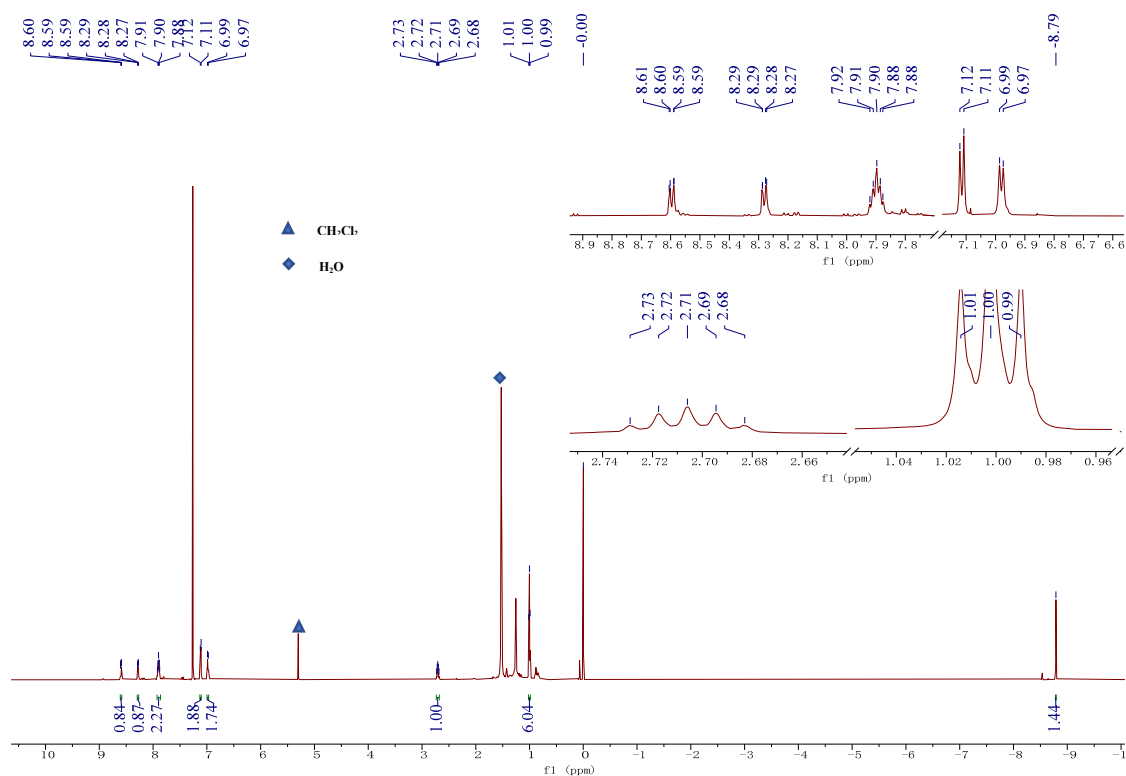

Figure S21 <sup>1</sup>H NMR spectrum of 4b (in CDCl<sub>3</sub>)

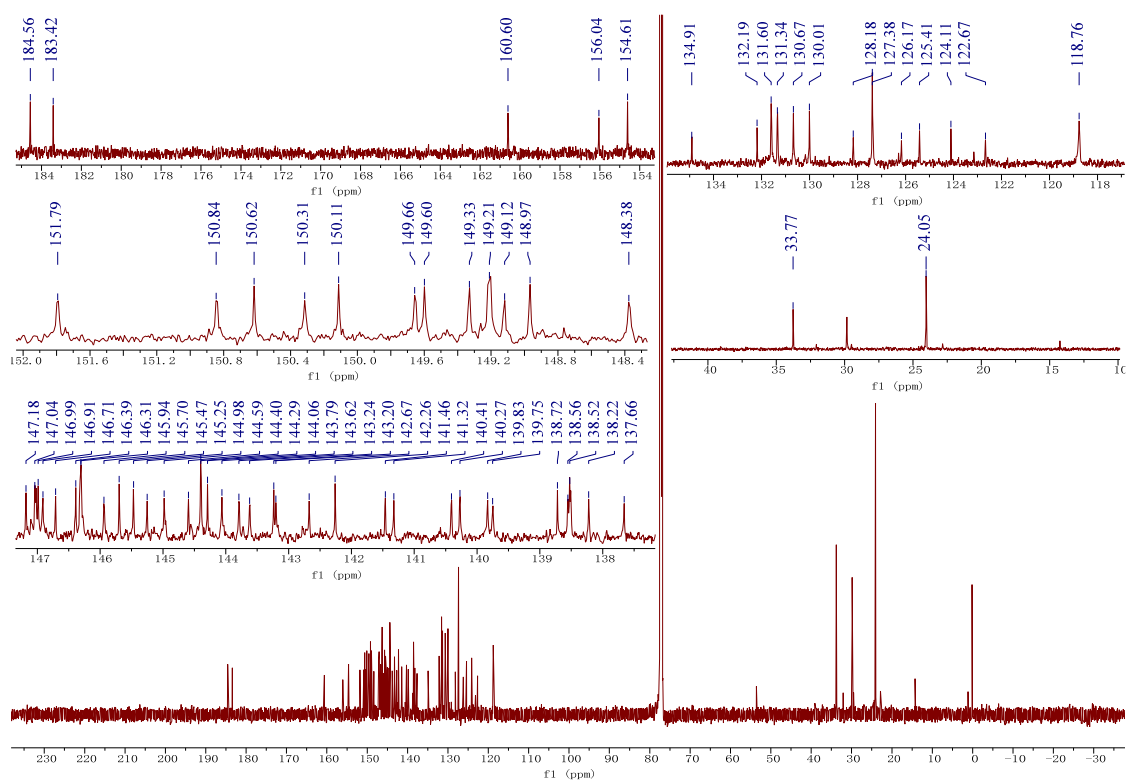

Figure S22 <sup>13</sup>C NMR spectrum of 4b (in CDCl<sub>3</sub>)

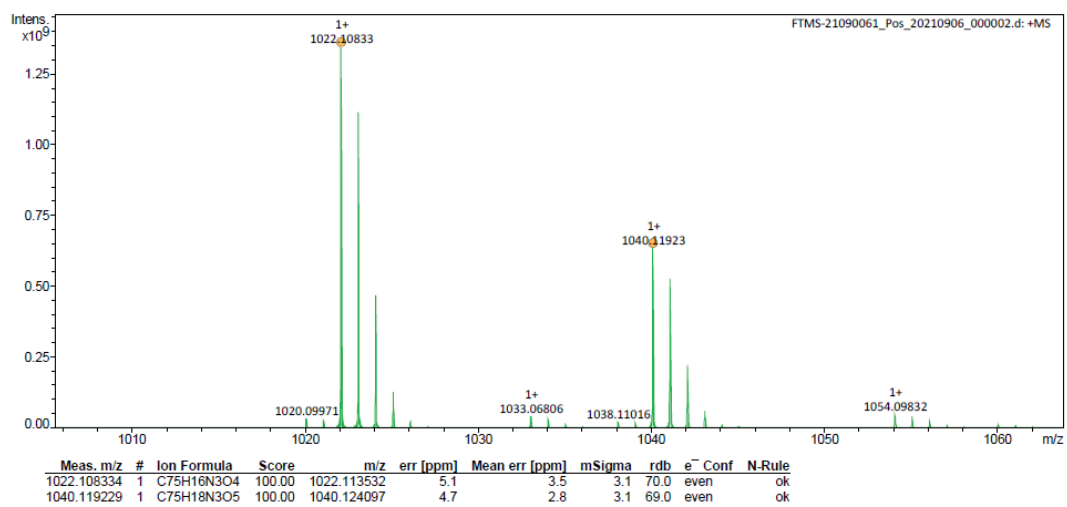

Figure S23 Mass spectrum of 4b

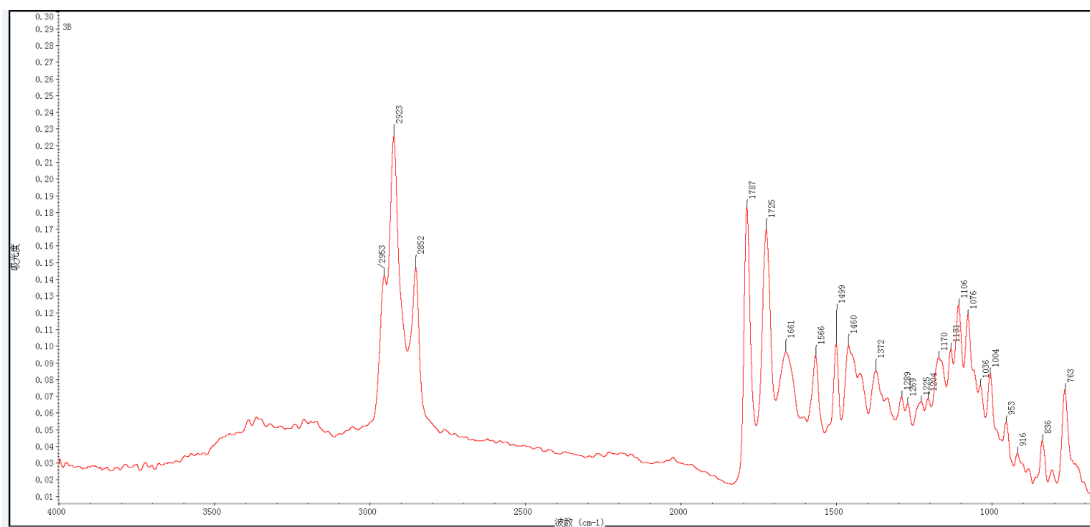

Figure S24 FTIR spectrum of 4b

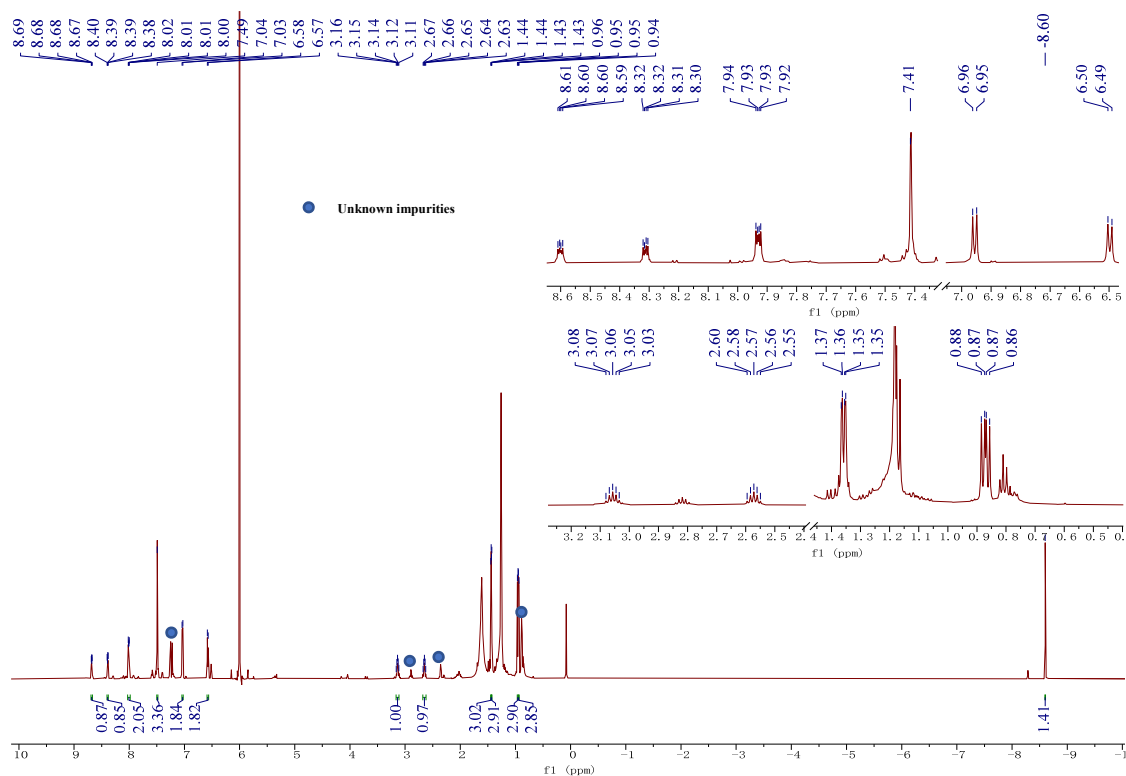

Figure S25  $^1\text{H}$  NMR spectrum of 5a (in  $\text{C}_2\text{D}_2\text{Cl}_4$ )

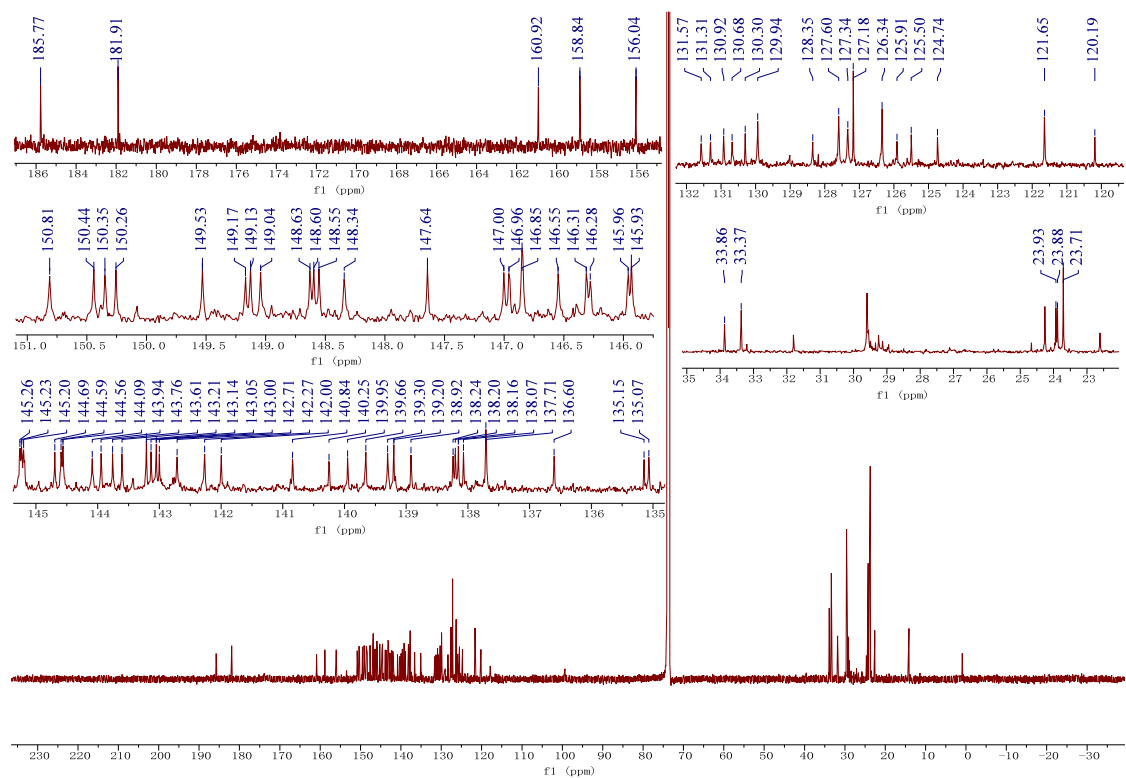

Figure S26  $^{13}\text{C}$  NMR spectrum of 5a (in  $\text{C}_2\text{D}_2\text{Cl}_4$ )

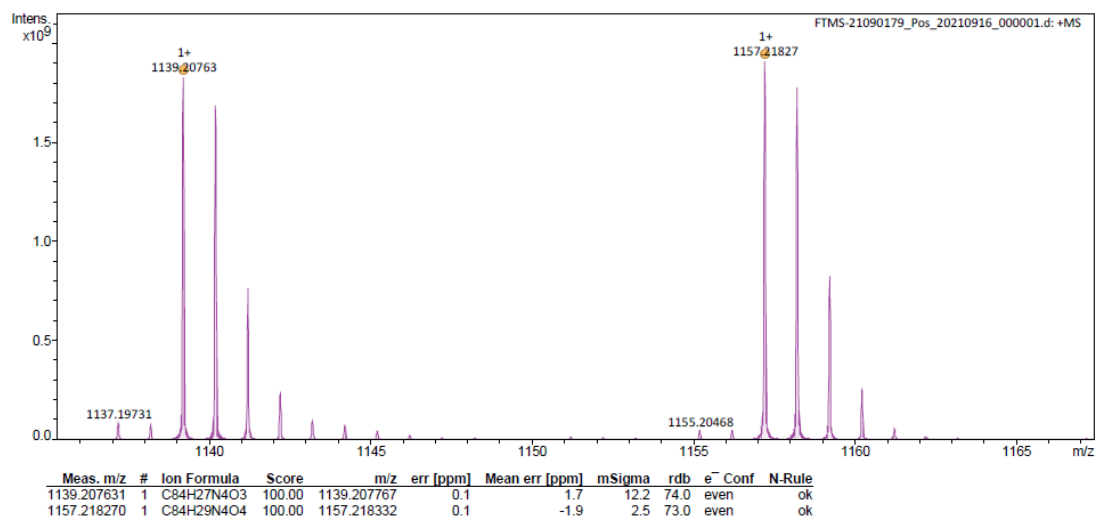

Figure S27 Mass spectrum of 5a

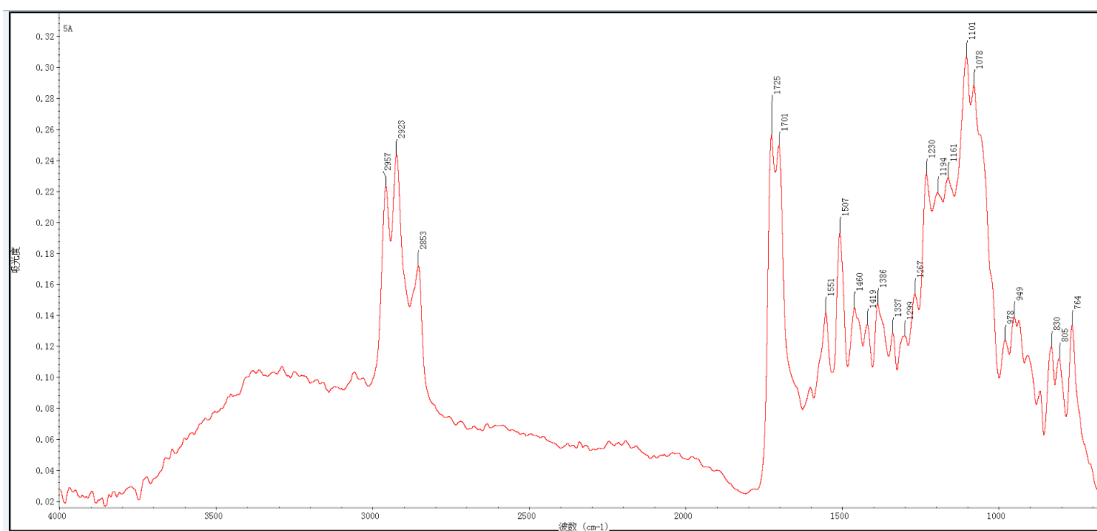

Figure S28 FTIR spectrum of 5a

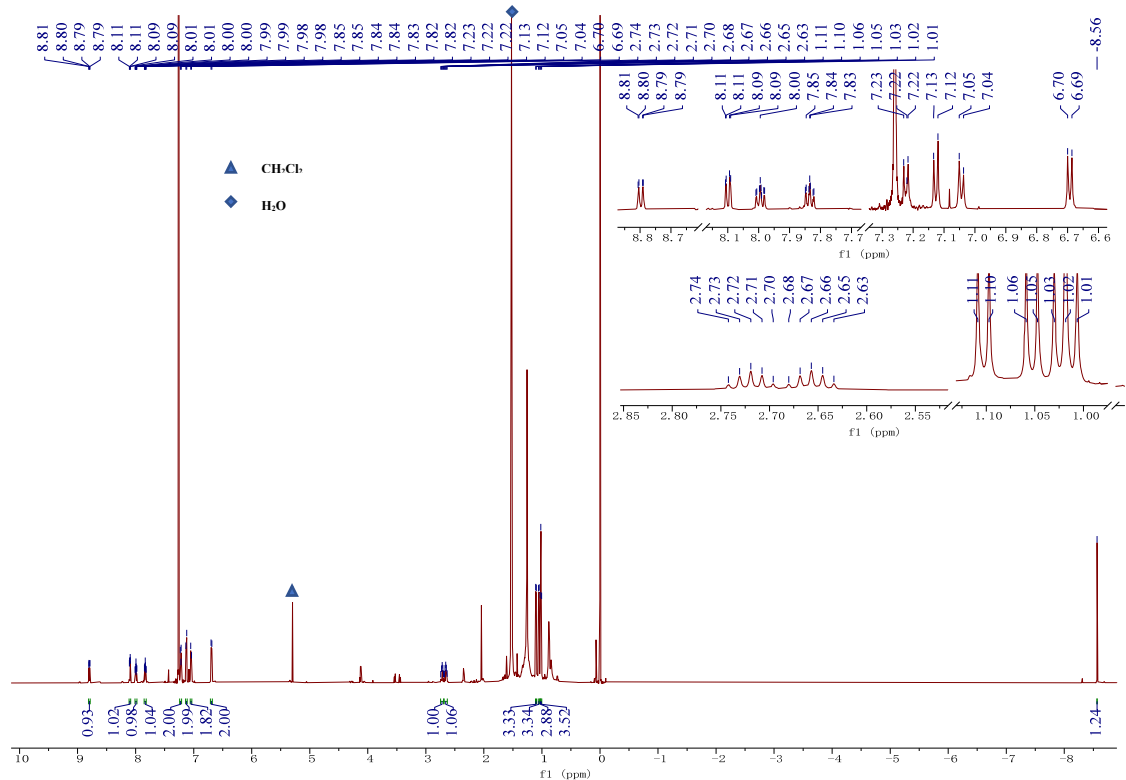

Figure S29  $^1\text{H}$  NMR spectrum of 5b (in  $\text{CDCl}_3$ )

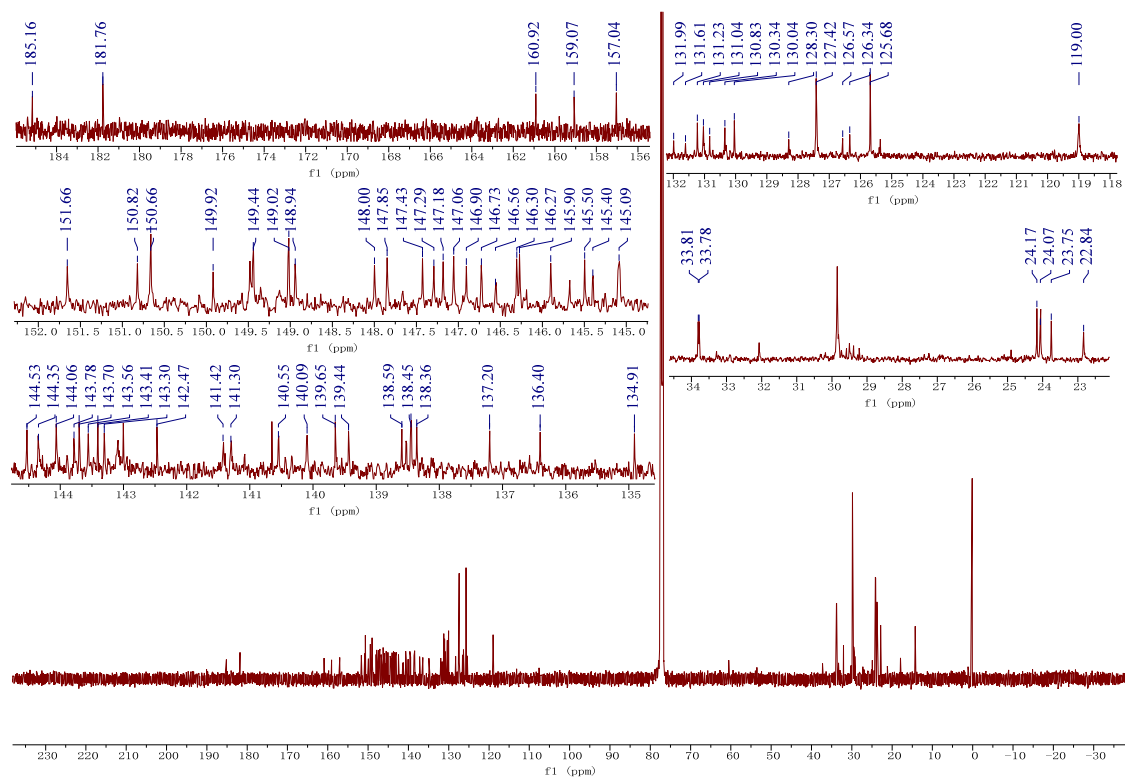

Figure S30  $^{13}\text{C}$  NMR spectrum of 5b (in  $\text{CDCl}_3$ )



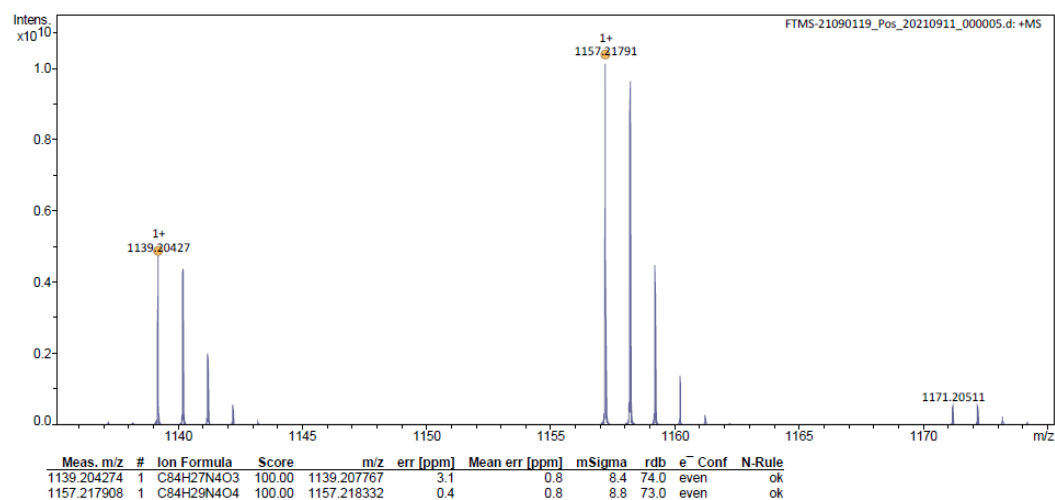

Figure S31 Mass spectrum of 5b

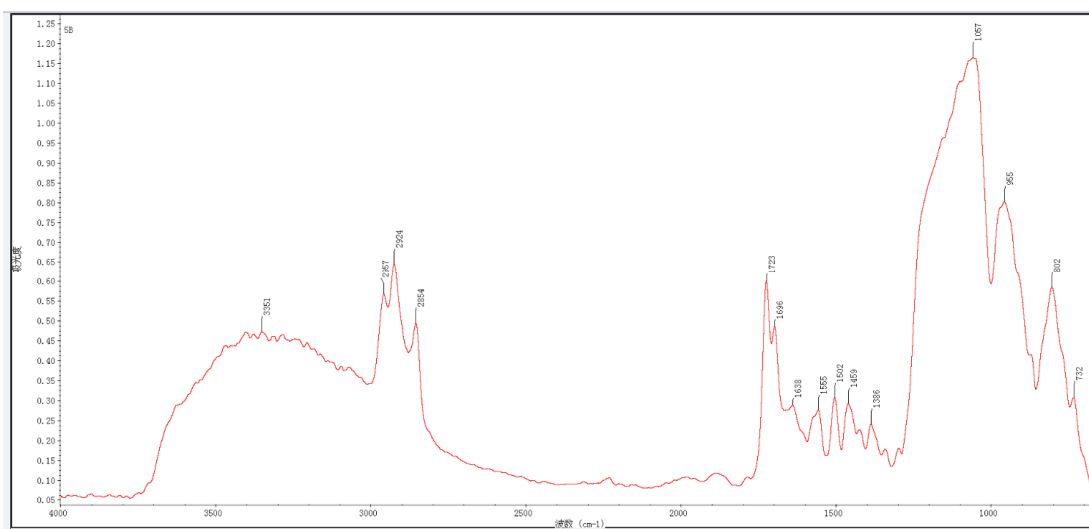

Figure S32 FTIR spectrum of 5b
